# Supplementary material for: Luminescence properties of a green-emitting mechanoluminescent phosphor CaSrGa 4 O 8 : x Tb 3+ without pre-excitation
Source: Royal Society of Chemistry journal article supplement (doi:10.1039/d4ra01745e), 2024-01-01
Supplement: d4ra01745e1.pdf [file d4ra01745e1.pdf]

## Supporting Information

### Luminescence properties of a green-emitting mechanoluminescent phosphor $\text{CaSrGa}_4\text{O}_8: x\text{Tb}^{3+}$ without pre-excitation

Rui Shi<sup>a,b</sup>, Wei Liu<sup>a,c</sup>, Lin Li<sup>a,b</sup>, Huan Li<sup>a,b</sup>, Zhijun Zhang<sup>a,b</sup>, Guanghui Rao<sup>a,b,c,\*</sup>, Jingtai Zhao<sup>a,b,c,\*</sup>  
<sup>a</sup> School of Materials Science and Engineering, Guilin University of Electronic Technology, Guilin 541004, China  
<sup>b</sup> Guangxi Key Laboratory of Information Materials, Guilin University of Electronic Technology, Guilin 541004, China  
<sup>c</sup> School of Mechanical and Electrical Engineering, Guilin University of Electronic Technology, Guilin 541004, China  
\*Corresponding author: Guanghui Rao Email: [rgh@guet.edu.cn](mailto:rgh@guet.edu.cn)  
Jingtai Zhao Email: [jtzhao@guet.edu.cn](mailto:jtzhao@guet.edu.cn)

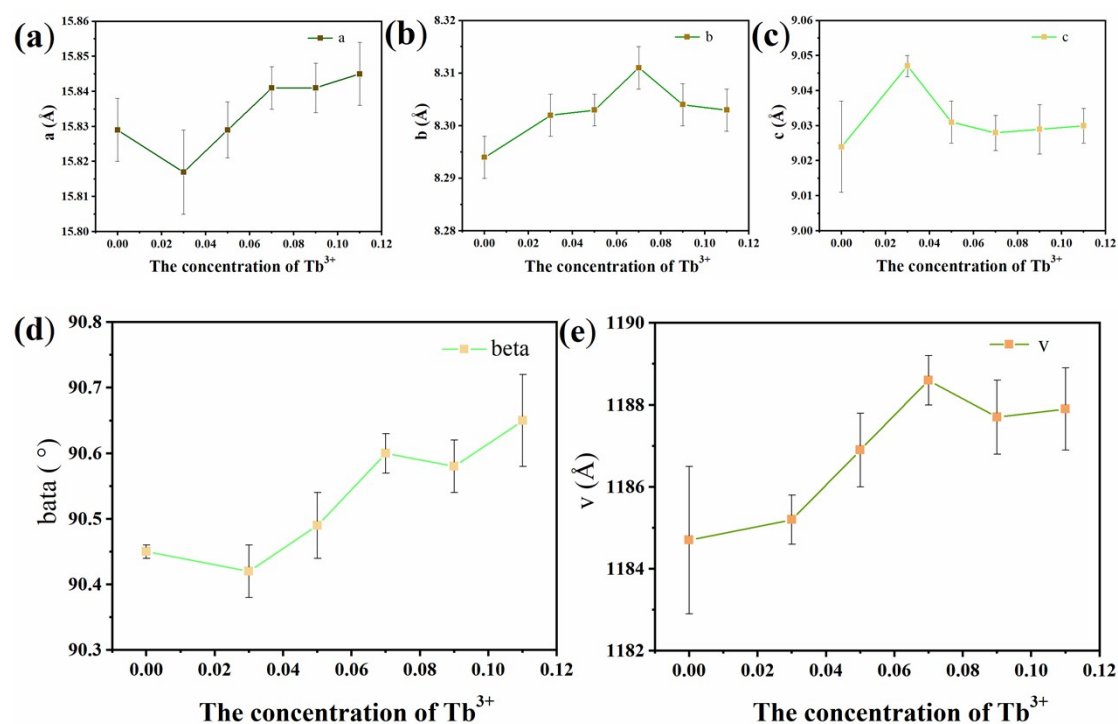

**Fig. S1** (a-e) Cell parameters ( $a/b/c/\beta/v$ ) of refinement with different concentrations of  $\text{Tb}^{3+}$  ions doping.

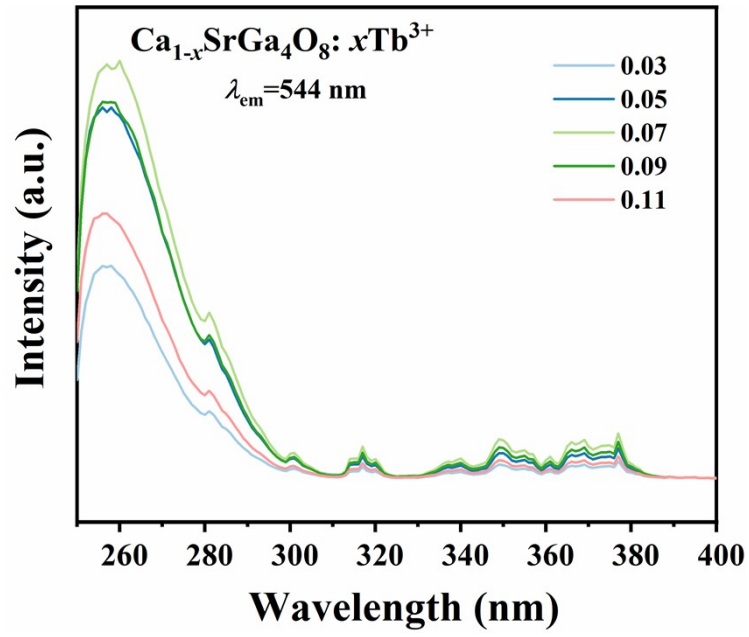

**Fig. S2** Excitation spectra of  $\text{Ca}_{1-x}\text{SrGa}_4\text{O}_8:x\text{Tb}^{3+}$  ( $x = 0.03, 0.05, 0.07, 0.09$  and  $0.11$ ) monitored at 544 nm
